# Supplementary material for: Hg2+ion-imprinted polymers sorbents based on dithizone–Hg2+chelation for mercury speciation analysis in environmental and biological samples
Source: Royal Society of Chemistry journal article supplement (doi:10.1039/c4ra08163c), 2014-01-01
Supplement: c4ra08163c1.pdf [file c4ra08163c1.pdf]

## Electronic Supplementary Information

### **Hg<sup>2+</sup> ion-imprinted polymers sorbents based on dithizone-Hg<sup>2+</sup> chelation for mercury speciation analysis in environmental and biological samples**

Zhong Zhang<sup>a,d</sup>, Jinhua Li<sup>a</sup>, Xingliang Song<sup>b</sup>, Jiping Ma<sup>c</sup>, Lingxin Chen<sup>a,\*</sup>

<sup>a</sup> *Key Laboratory of Coastal Environmental Processes and Ecological Remediation, Shandong Provincial Key Laboratory of Coastal Environmental Processes, Yantai Institute of Coastal Zone Research, Chinese Academy of Sciences, Yantai 264003, China*

<sup>b</sup> *School of Chemistry & Chemical Engineering, Linyi University, Linyi 276005, China*

<sup>c</sup> *Key Lab of Environmental Engineering in Shandong Province, School of Environment & Municipal Engineering, Qingdao Technological University, Qingdao 266033, China*

<sup>d</sup> *University of Chinese Academy of Sciences, Beijing 100049, China*

\* Corresponding author. Tel./Fax: +86 535 2109130.

*E-mail address:* lxchen@yic.ac.cn (L. Chen).

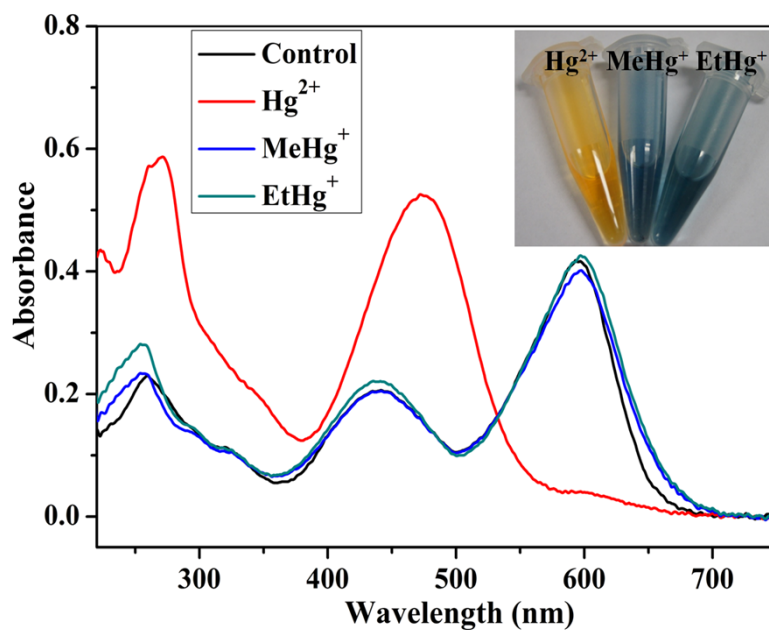

**Figure S1.** UV-vis spectra of dithizone alone (Control), and the dithizone with  $\text{Hg}^{2+}$ ,  $\text{MeHg}^+$  and  $\text{EtHg}^+$ , respectively. The inset image shows dithizone with  $\text{Hg}^{2+}$ ,  $\text{MeHg}^+$  and  $\text{EtHg}^+$  from left to right.

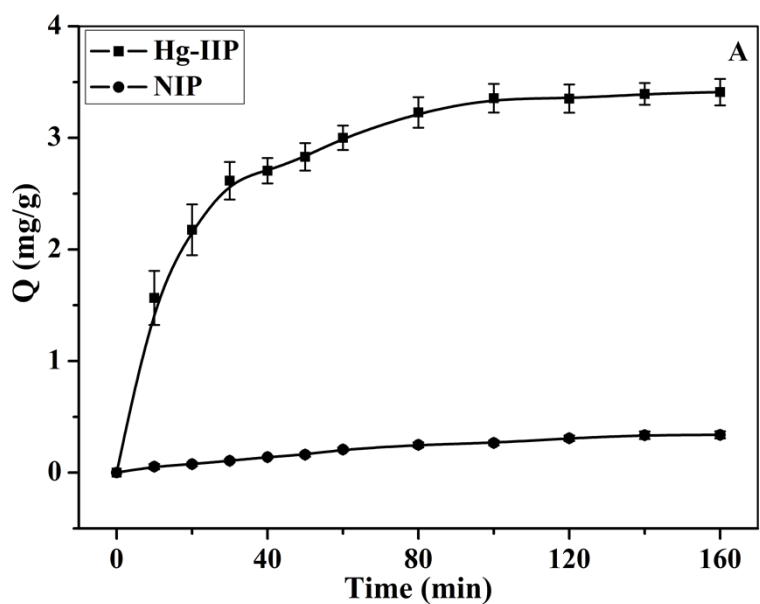

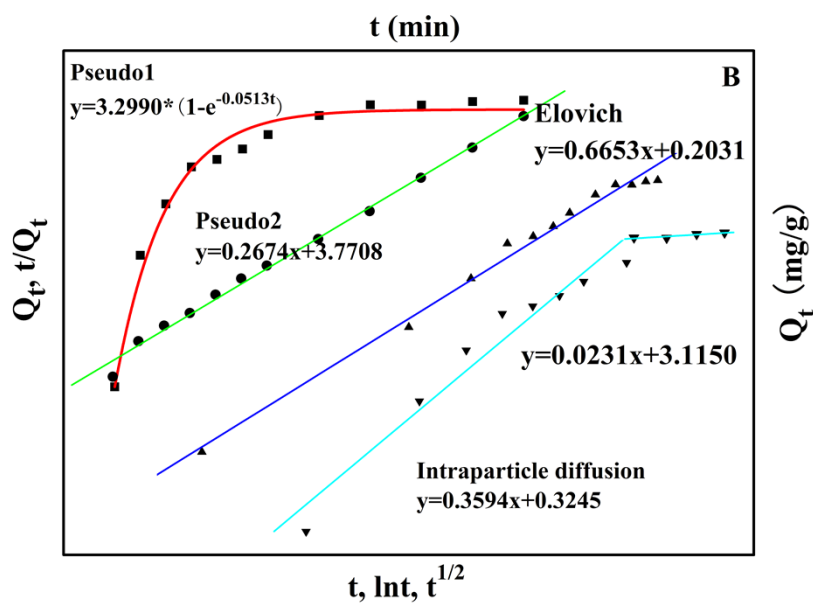

**Figure S2.** (A) Adsorption kinetics curves of IIPs and NIPs for  $\text{Hg}^{2+}$  in aqueous solution, and (B) Pseudo-first-order, Pseudo-second-order, Elovich and intraparticle diffusion kinetic models for  $\text{Hg}^{2+}$  towards IIPs. Experimental conditions:  $\text{Hg}^{2+}$  concentration, 10 mg/L,  $V = 10$  mL, polymer, 20 mg, room temperature.

**Table S1.** Specific surface area and other related data of Hg-IIPs and NIPs obtained by BET analysis.

| IIPs    | Specific surface area<br>( $\text{m}^2/\text{g}$ ) | Cumulative pore volume<br>( $\text{mL}/\text{g}$ ) | Average pore diameter<br>(nm) | Cumulative pore area<br>( $\text{m}^2/\text{g}$ ) |
|---------|----------------------------------------------------|----------------------------------------------------|-------------------------------|---------------------------------------------------|
| Hg-IIPs | 43.27                                              | 0.1758                                             | 9.42                          | 90.23                                             |
| NIPs    | 22.92                                              | 0.0994                                             | 5.62                          | 63.13                                             |

**Table S2.** Isotherm model parameters for Hg-IIPs and NIPs.

| Isotherm Model                                                                                 | Parameter                 | Hg-IIPs | NIPs  |
|------------------------------------------------------------------------------------------------|---------------------------|---------|-------|
| Langmuir<br>$\left( \frac{C_e}{Q_e} = \frac{1}{Q_{\max}} C_e + \frac{1}{K_f Q_{\max}} \right)$ | $R^2$ <sup>(a)</sup>      | 0.998   | 0.998 |
|                                                                                                | $Q_{\max}$ <sup>(b)</sup> | 4.451   | 0.633 |
|                                                                                                | $K_f$ <sup>(c)</sup>      | 1.306   | 0.121 |
| Freundlich<br>$\left( \lg Q_e = \frac{1}{n} \lg C_e + \lg K_f \right)$                         | $R^2$                     | 0.980   | 0.989 |
|                                                                                                | $K_f$ <sup>(d)</sup>      | 6.315   | 0.003 |
|                                                                                                | $1/n$ <sup>(e)</sup>      | 0.353   | 0.621 |
| Langmuir-Freundlich<br>$\left( B = \frac{N_t \alpha F^m}{1 + \alpha F^m} \right)$              | $R^2$                     | 0.979   | 0.992 |
|                                                                                                | $N_t$ <sup>(f)</sup>      | 4.730   | 0.688 |
|                                                                                                | $\alpha$ <sup>(g)</sup>   | 1.115   | 0.112 |
|                                                                                                | $m$ <sup>(h)</sup>        | 0.721   | 0.956 |

(a) Correlation coefficient.

(b) Maximum binding capacity, mg/g.

(c) Langmuir constant.

(d) Indicative constant for adsorption capacity of the adsorbent.

(e) Reflect the adsorption intensity or surface heterogeneity, ranging from 0 to 1.

(f) Total number of binding sites, mg /g.

(g) Equal to the median binding affinity constant, g/mg.

(h) Heterogeneity index, which will be equal to 1 for a homogeneous material, or will take values within 0 and 1 if the material is heterogeneous.

**Table S3.** Parameters obtained of Hg<sup>2+</sup> adsorption towards Hg-IIP from four kinetic models.

| Kinetic Models                                                               | Parameters                                                                  |                                                            |                         |
|------------------------------------------------------------------------------|-----------------------------------------------------------------------------|------------------------------------------------------------|-------------------------|
| Pseudo-first-order<br>$\ln(Q_e - Q_t) = \ln Q_e - k_1 t$                     | $k_1 (\text{min}^{-1})$ <sup>(a)</sup><br>0.051                             | $Q_e (\mu\text{mol/g})$ <sup>(b)</sup><br>3.298            | $R^2$<br>0.983          |
| Pseudo-second-order<br>$\frac{t}{Q_t} = \frac{1}{k_2 Q_e^2} + \frac{t}{Q_e}$ | $k_2 (\text{g}/(\mu\text{mol} \cdot \text{min}))$ <sup>(c)</sup><br>0.019   | $Q_e (\mu\text{mol/g})$<br>3.740                           | $R^2$<br>0.999          |
| Elovich<br>$Q_t = \frac{1}{\beta} \ln(a\beta) + \frac{1}{\beta} \ln(t)$      | $\alpha (\mu\text{mol/g})$ <sup>(d)</sup><br>0.902                          | $\beta (\text{min} \cdot \text{g}/\mu\text{mol})$<br>1.503 | $R^2$<br>0.982          |
| Intraparticle diffusion<br>$Q_t = k_p t^{1/2} + C$                           | $k_p (\mu\text{mol}/(\text{g min}^{0.5}))$ <sup>(e)</sup><br>0.359<br>0.023 | $C (\mu\text{mol/g})$ <sup>(f)</sup><br>0.3245<br>3.115    | $R^2$<br>0.974<br>0.989 |

(a)  $k_1$  is the rate constant of adsorption in pseudo-first-order model.

(b)  $Q_e$  is the final adsorption amount at equilibrium,  $Q_t$  is the instantaneous adsorption amount in the adsorbent at time  $t$ .

(c)  $k_2$  is the rate constant of adsorption in pseudo-second-order model.

(d)  $\alpha$  and  $\beta$  represent the initial adsorption rate and desorption constant in Elovich model.

(e)  $k_p$  indicates the intraparticle diffusion rate constant and relates to the particle size  $R$  with

the equation  $k_p = \frac{6Q_e}{R} \sqrt{\frac{D}{\pi}}$ ,

(f)  $C$  provides information about the thickness of the boundary layer.

**Table S4.** Method performance comparisons for mercury species by IIPs based SPE.

| Template                                      | Functional monomer    | Polymerization method         | Preparation feature                                             | Detection technology  | pH      | LOD ( $\mu\text{g/L}$ )                                                  | Real sample                                 | Ref.      |
|-----------------------------------------------|-----------------------|-------------------------------|-----------------------------------------------------------------|-----------------------|---------|--------------------------------------------------------------------------|---------------------------------------------|-----------|
| The chelate of dithizone and $\text{Hg}^{2+}$ | APTES <sup>(a)</sup>  | Sol-gel process               | Using chelate as template                                       | AFS                   | 7.0-8.0 | 0.015 ( $\text{Hg}^{2+}$ )<br>0.02 ( $\text{MeHg}^+$ , $\text{EtHg}^+$ ) | Seawater, lake water, human hair, fish meat | This work |
| $\text{Hg}^{2+}$                              | T-IPTS <sup>(b)</sup> | Sol-gel process               | Synthesizing new monomer                                        | AFS                   | 8.0     | 0.03 ( $\text{Hg}^{2+}$ )                                                | River water, tap water                      | 1         |
| The chelate of PDC and $\text{Hg}^{2+}$       | MAA <sup>(c)</sup>    | Grafting and copolymerization | Forming P(PDC-Hg)/SiG <sup>(d)</sup>                            | CV-AAS <sup>(e)</sup> | 6.0-7.0 | 0.02 ( $\text{Hg}^{2+}$ , $\text{MeHg}^+$ )                              | Wine                                        | 2         |
| $\text{Hg}^{2+}$                              | VP <sup>(f)</sup>     | Copolymerization              | Copolymerizing of $\text{Hg}^{2+}$ , DAAB <sup>(g)</sup> and VP | CV-AAS                | 8.0     | 0.05 ( $\text{Hg}^{2+}$ )                                                | Tap water, river water, seawater            | 3         |

(a) 3-Aminopropyltriethoxysilane (APTES).

(b) 3-Isocyanatopropyltriethoxysilane (IPTS) bearing thymine (T) base.

(c) Methacrylic acid.

(d) Using silica gel chemically modified with 3-(trimethoxysilyl)propyl methacrylate (TSPM) as supporting material, and the Hg(II) IIP layer was grafted by copolymerization of MAA and trimethylolpropane trimethacrylate in the presence of Hg(II) complexes with the chelating agent 1-pyrrolidinedithiocarboxylic acid (PDC).

(e) Cold vapor atomic absorption spectrometry.

(f) Vinylpyridine.

(g) Diazoaminobenzene.

## References

- 1 S. F. Xu, L. X. Chen, J. H. Li, Y. F. Guan and H. Z. Lu, *J. Hazard. Mater.*, 2012, **237–238**, 347.
- 2 I. Dakova, T. Yordanova and I. Karadjova, *J. Hazard. Mater.*, 2012, **231**, 49.
- 3 Y. W. Liu, X. J. Chang, D. Yang, Y. Guo and S. M. Meng, *Anal. Chim. Acta*, 2005, **538**, 85.
